# Supplementary material for: m6A-Mediated Upregulation of Imprinted in Prader–Willi Syndrome Induces Aberrant Apical–Basal Polarization and Oxidative Damage in RPE Cells
Source: PubMed Central journal article supplement — Invest Ophthalmol Vis Sci. 2024 Feb 5;65(2):10. doi: 10.1167/iovs.65.2.10 (PMC10851782; doi:10.1167/iovs.65.2.10), 2024-02-05
Supplement: iovs-65-2-10_s001.pdf [file iovs-65-2-10_s001.pdf]

---

**Supplementary Table S1. Sequences of siRNA/gRNA.**

---

| <b>siRNA/mimic/inhibitor/agomir</b> | <b>Sequence (5'→3')</b>                                              |
|-------------------------------------|----------------------------------------------------------------------|
| scramble siRNA                      | sense: UUCUCCGAACGUGUCACGUdTdT<br>antisense: ACGUGACACGUUCGGAGAAdTdT |
| YTHDC1-siRNA                        | sense: CAAGGAGUGUUAUCUUAUdTdT<br>antisense: AUUAAGAUAACACUCCUUGdTdT  |
| gRNA-1                              | AGCTGGCAGTAGAAGGAATGGCACCAACTCAACAAATCCA                             |
| gRNA-2                              | ATCACCTTTAGTGGGTGGTCTAGGCAATGCATAGGTGAGG                             |
| gRNA-3                              | CTTTTTAATATAGTCTGTATTTTTCAGTTTACCATGTGGC                             |
| gRNA-4                              | ATAGAGGAAAACCTATAGGGACAGAATTGGAAGAGAGGAGG                            |

---

---

**Supplementary Table S2. Primers used in this study**

---

| <b>LncRNA/mRNA</b>                     | <b>Forward Primer (5'→3')</b>                                          | <b>Reverse Primer (5'→3')</b> |
|----------------------------------------|------------------------------------------------------------------------|-------------------------------|
| GAPDH                                  | CAGCCTCAAGATCATCAGCA                                                   | TGTGGTCATGAGTCCTTCCA          |
| IPW                                    | GCCCTTGCCTTAACCTTTCAGA                                                 | GCAGTAGAAGGAATGGCACC          |
| MEG3                                   | CAGCCAGCTGTCCCTCTTAC                                                   | TCGACAAAGACTGACACCCC          |
| MerTK                                  | CGCTCTGGCGTAGAGCTATC                                                   | AGGCTGGGTTGGTGAAAACA          |
| Na <sup>+</sup> /K <sup>+</sup> ATPase | TCTCCCGCTAAGGTCCCTC                                                    | GACAGCTTGTGGTCATCCATTG        |
| U6                                     | Bulge-loop <sup>TM</sup> miRNA qRT-PCR Primer Sets designed by RiboBio |                               |
| SELECT-IPW-Up                          | tagccagtaccgtagtgcgtgAAGGGAAACAGTCACCATGCCCAAATTAAG                    |                               |
| SELECT-IPW-Down                        | 5phos/CTCATCGATGATATCCCAACATGAGCATTTCTcagaggctgagtcgctgcat             |                               |

---

**Supplementary Table S3. Antibodies used in this study**

| <b>Anti-protein</b>                                                            | <b>Host</b> | <b>Dilution and Application</b>                      | <b>Supplier</b>           | <b>Catalog</b> |
|--------------------------------------------------------------------------------|-------------|------------------------------------------------------|---------------------------|----------------|
| m <sup>6</sup> A                                                               | Rabbit      | 1:100, MeRIP-qPCR                                    | Merck                     | ABE572         |
| m <sup>6</sup> A                                                               | Rabbit      | 1:100, MeRIP-Seq                                     | Synaptic system           | SS-202 003-50  |
| GAPDH                                                                          | Mouse       | 1:20000, Immunoblotting                              | Proteintech               | 60004-1-Ig     |
| YTHDC1                                                                         | Rabbit      | 1:50, RIP                                            | Proteintech               | 14392-1-AP     |
| MerTK                                                                          | Rabbit      | 1:1000, Immunoblotting;<br>1:400, Immunofluorescence | Cell Signaling Technology | 4319           |
| Na <sup>+</sup> /K <sup>+</sup> ATPase subunits<br>alpha-1, beta-1 and alpha-4 | Rabbit      | 1:1000, Immunoblotting;<br>1:50, Immunofluorescence  | Beyotime                  | AG1183         |
| ZO-1                                                                           | Rabbit      | 1:1000, Immunoblotting;<br>1:50, Immunofluorescence  | Invitrogen                | 40-2200        |
| β-catenin                                                                      | Rabbit      | 1:1000, Immunoblotting;<br>1:250, Immunofluorescence | Abcam                     | ab32572        |
| Caspase 3                                                                      | Rabbit      | 1:1000, Immunoblotting                               | Proteintech               | 19677-1-AP     |
| Cleaved caspase-3                                                              | Rabbit      | 1:1000, Immunoblotting                               | Cell Signaling Technology | 9661           |
| Bax                                                                            | Rabbit      | 1:1000, Immunoblotting                               | Proteintech               | 50599-2-Ig     |

|        |        |                        |                           |            |
|--------|--------|------------------------|---------------------------|------------|
| Bcl-2  | Rabbit | 1:1000, Immunoblotting | Proteintech               | 12789-1-AP |
| p-AKT  | Rabbit | 1:1000, Immunoblotting | Cell Signaling Technology | 4060       |
| AKT    | Rabbit | 1:1000, Immunoblotting | Cell Signaling Technology | 9272       |
| p-mTOR | Rabbit | 1:1000, Immunoblotting | Cell Signaling Technology | 5536       |
| mTOR   | Rabbit | 1:1000, Immunoblotting | Cell Signaling Technology | 2983       |

---

---

**Supplementary Table S4. Sample information and IPW expression level.**

---

| <b>GSM No.</b> | <b>tissue</b> | <b>Clinical diagnosis</b> | <b>Age</b> | <b>Gender</b> | <b>IPW expression</b> |
|----------------|---------------|---------------------------|------------|---------------|-----------------------|
| GSM738433      | macular       | normal                    | 9          | male          | 34.4                  |
| GSM738435      | macular       | normal                    | 10         | male          | 21.8                  |
| GSM738437      | macular       | normal                    | 18         | female        | 31.1                  |
| GSM738439      | macular       | normal                    | 21         | female        | 26.5                  |
| GSM738441      | macular       | normal                    | 34         | male          | 14.6                  |
| GSM738443      | macular       | normal                    | 36         | female        | 21.8                  |
| GSM738445      | macular       | normal                    | 37         | male          | 38.3                  |
| GSM738447      | macular       | normal                    | 40         | female        | 8.5                   |
| GSM738450      | macular       | normal                    | 45         | male          | 23.7                  |
| GSM738452      | macular       | normal                    | 47         | male          | 19.3                  |
| GSM738453      | macular       | normal                    | 48         | male          | 27.8                  |
| GSM738455      | macular       | normal                    | 48         | male          | 18.1                  |
| GSM738457      | macular       | normal                    | 49         | female        | 14                    |
| GSM738459      | macular       | normal                    | 49         | male          | 43                    |
| GSM738461      | macular       | normal                    | 49         | male          | 18.3                  |
| GSM738464      | macular       | normal                    | 61         | male          | 25.1                  |
| GSM738466      | macular       | normal                    | 63         | male          | 22.9                  |
| GSM738469      | macular       | normal                    | 65         | male          | 17                    |
| GSM738471      | macular       | normal                    | 65         | male          | 23.5                  |
| GSM738472      | macular       | normal                    | 65         | female        | 13.2                  |
| GSM738474      | macular       | normal                    | 66         | female        | 30.8                  |
| GSM738476      | macular       | normal                    | 67         | male          | 44.7                  |
| GSM738478      | macular       | normal                    | 68         | female        | 16.3                  |
| GSM738480      | macular       | normal                    | 68         | male          | 18.9                  |
| GSM738483      | macular       | normal                    | 69         | male          | 17                    |
| GSM738484      | macular       | normal                    | 73         | male          | 15.6                  |
| GSM738486      | macular       | normal                    | 73         | male          | 24.9                  |

|           |         |        |    |        |      |
|-----------|---------|--------|----|--------|------|
| GSM738488 | macular | normal | 74 | male   | 42.9 |
| GSM738491 | macular | normal | 75 | female | 9.7  |
| GSM738494 | macular | normal | 76 | female | 20.3 |
| GSM738495 | macular | normal | 76 | female | 15.9 |
| GSM738497 | macular | normal | 78 | male   | 13.5 |
| GSM738498 | macular | normal | 78 | female | 25.7 |
| GSM738500 | macular | normal | 78 | female | 20.4 |
| GSM738503 | macular | normal | 81 | male   | 39.8 |
| GSM738505 | macular | normal | 82 | female | 14.9 |
| GSM738506 | macular | normal | 83 | male   | 24.2 |
| GSM738508 | macular | normal | 84 | male   | 20   |
| GSM738510 | macular | normal | 84 | male   | 12.5 |
| GSM738511 | macular | normal | 85 | female | 21.2 |
| GSM738512 | macular | normal | 86 | female | 26   |
| GSM738514 | macular | normal | 86 | male   | 27.5 |
| GSM738515 | macular | normal | 87 | female | 13   |
| GSM738516 | macular | normal | 88 | male   | 20.2 |
| GSM738518 | macular | normal | 88 | female | 21.1 |
| GSM738520 | macular | normal | 88 | male   | 12.7 |
| GSM738521 | macular | normal | 90 | female | 20.3 |
| GSM738523 | macular | normal | 91 | male   | 24.8 |
| GSM738525 | macular | normal | 92 | male   | 23.2 |
| GSM738527 | macular | normal | 93 | female | 16.2 |
| GSM738554 | macular | MD2    | 78 | female | 39.5 |
| GSM738597 | macular | MD2    | 91 | male   | 28.8 |
| GSM738603 | macular | MD2    | 93 | female | 23.8 |
| GSM738562 | macular | MD2    | 79 | male   | 20.1 |
| GSM738568 | macular | MD1    | 83 | male   | 22   |
| GSM738584 | macular | MD1    | 86 | female | 19.2 |

|           |         |                    |    |        |      |
|-----------|---------|--------------------|----|--------|------|
| GSM738593 | macular | MD1                | 90 | female | 21   |
| GSM738533 | macular | MD1                | 63 | male   | 29.2 |
| GSM738535 | macular | MD1                | 64 | male   | 22.3 |
| GSM738537 | macular | MD1                | 65 | female | 22.9 |
| GSM738541 | macular | GA                 | 74 | female | 31   |
| GSM738591 | macular | GA                 | 90 | male   | 20.6 |
| GSM738551 | macular | CNV                | 78 | male   | 34   |
| GSM738558 | macular | CNV                | 79 | male   | 25.4 |
| GSM738560 | macular | CNV                | 79 | female | 18.7 |
| GSM738570 | macular | CNV                | 84 | female | 32.6 |
| GSM738587 | macular | CNV                | 87 | male   | 31.7 |
| GSM738556 | macular | Clinical diagnosis | 78 | male   | 24   |
| GSM738572 | macular | Clinical diagnosis | 84 | male   | 29.4 |
| GSM738574 | macular | Clinical diagnosis | 85 | male   | 15.9 |
| GSM738585 | macular | Clinical diagnosis | 86 | female | 43.1 |
| GSM738589 | macular | Clinical diagnosis | 88 | female | 18   |
| GSM738601 | macular | Clinical diagnosis | 92 | female | 24.4 |
| GSM738578 | macular | GA/CNV             | 86 | female | 18.8 |
| GSM738599 | macular | GA/CNV             | 92 | male   | 28.6 |
| GSM738529 | macular | dry AMD            | 43 | male   | 21.2 |
| GSM738531 | macular | dry AMD            | 63 | female | 29.9 |
| GSM738539 | macular | dry AMD            | 71 | male   | 17.2 |
| GSM738543 | macular | dry AMD            | 76 | female | 22.5 |
| GSM738545 | macular | dry AMD            | 77 | male   | 41   |
| GSM738547 | macular | dry AMD            | 77 | female | 73   |
| GSM738549 | macular | dry AMD            | 77 | female | 19.7 |
| GSM738553 | macular | dry AMD            | 78 | male   | 27.1 |
| GSM738564 | macular | dry AMD            | 80 | female | 21.7 |
| GSM738566 | macular | dry AMD            | 83 | female | 40.2 |

|           |         |         |     |        |      |
|-----------|---------|---------|-----|--------|------|
| GSM738576 | macular | dry AMD | 86  | female | 17.2 |
| GSM738580 | macular | dry AMD | 86  | female | 38.2 |
| GSM738582 | macular | dry AMD | 86  | female | 21.8 |
| GSM738595 | macular | dry AMD | 91  | female | 30.2 |
| GSM738605 | macular | dry AMD | 94  | female | 17   |
| GSM738607 | macular | dry AMD | 101 | female | 32.5 |

---
